# Supplementary material for: Combination Therapy of Curcumin and Disulfiram Synergistically Inhibits the Growth of B16-F10 Melanoma Cells by Inducing Oxidative Stress
Source: MDPI journal article supplement (doi:10.3390/biom12111600), 2022-10-31
Supplement: s1 [file s1]

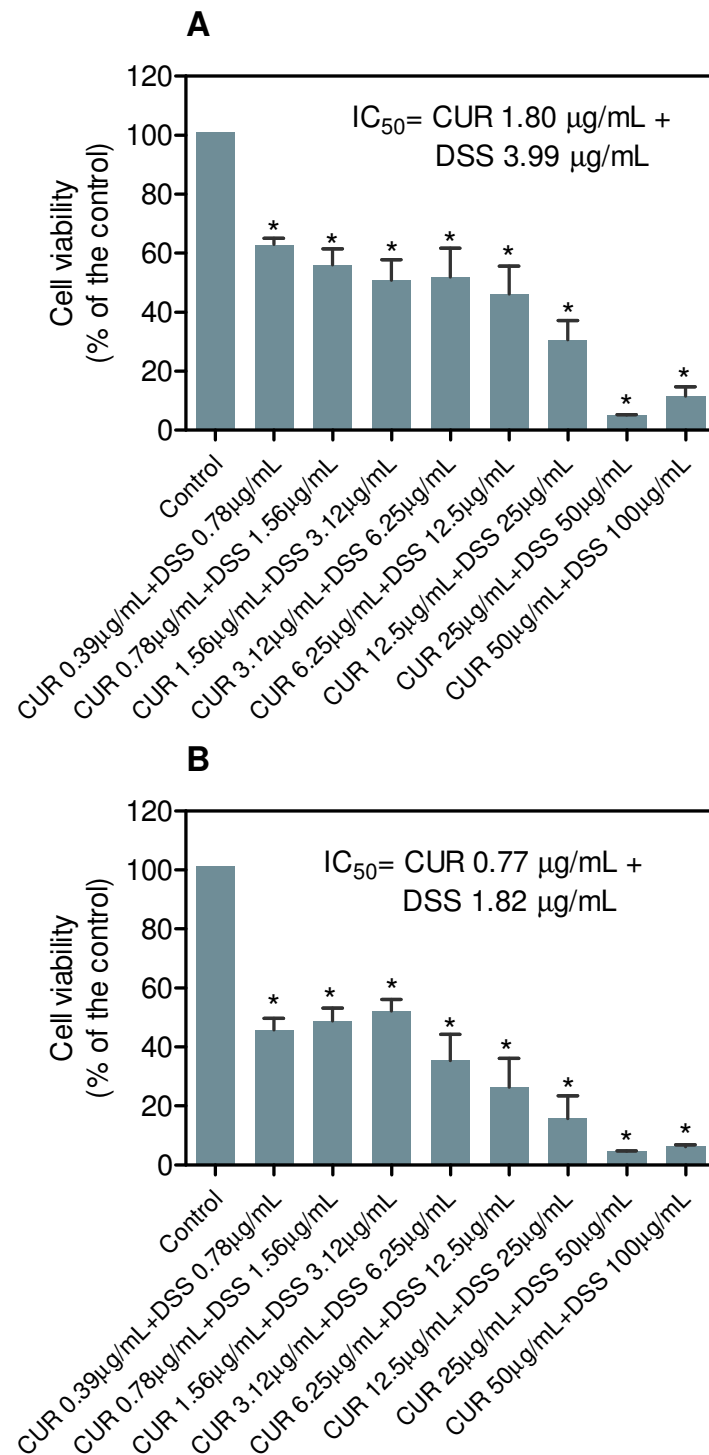

**Figure S1.** Effect of the combination of CUR and DSS at a ratio of 1:2 on the viability of B16-F10 (**A**) and MRC-5 (**B**) cells measured by the alamar blue method after 72 h of incubation. Data are shown as the mean  $\pm$  S.E.M. of at least three independent experiments carried out in duplicate. \* $P < 0.05$  compared with control (untreated cells) by ANOVA followed by Student Newman–Keuls test.

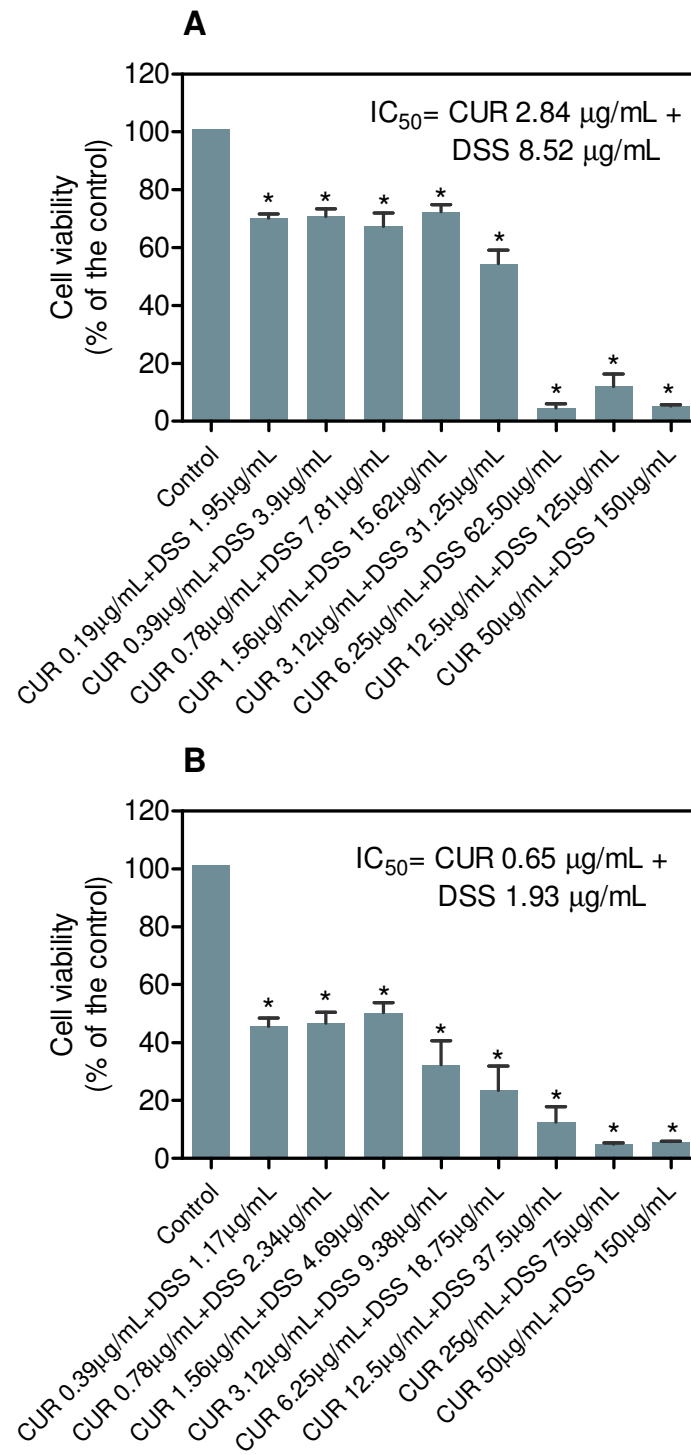

**Figure S2.** Effect of the combination of CUR and DSS at a ratio of 1:3 on the viability of B16-F10 (**A**) and MRC-5 (**B**) cells measured by the alamar blue method after 72 h of incubation. Data are shown as the mean  $\pm$  S.E.M. of at least three independent experiments carried out in duplicate. \* $P < 0.05$  compared with control (untreated cells) by ANOVA followed by Student Newman–Keuls test.

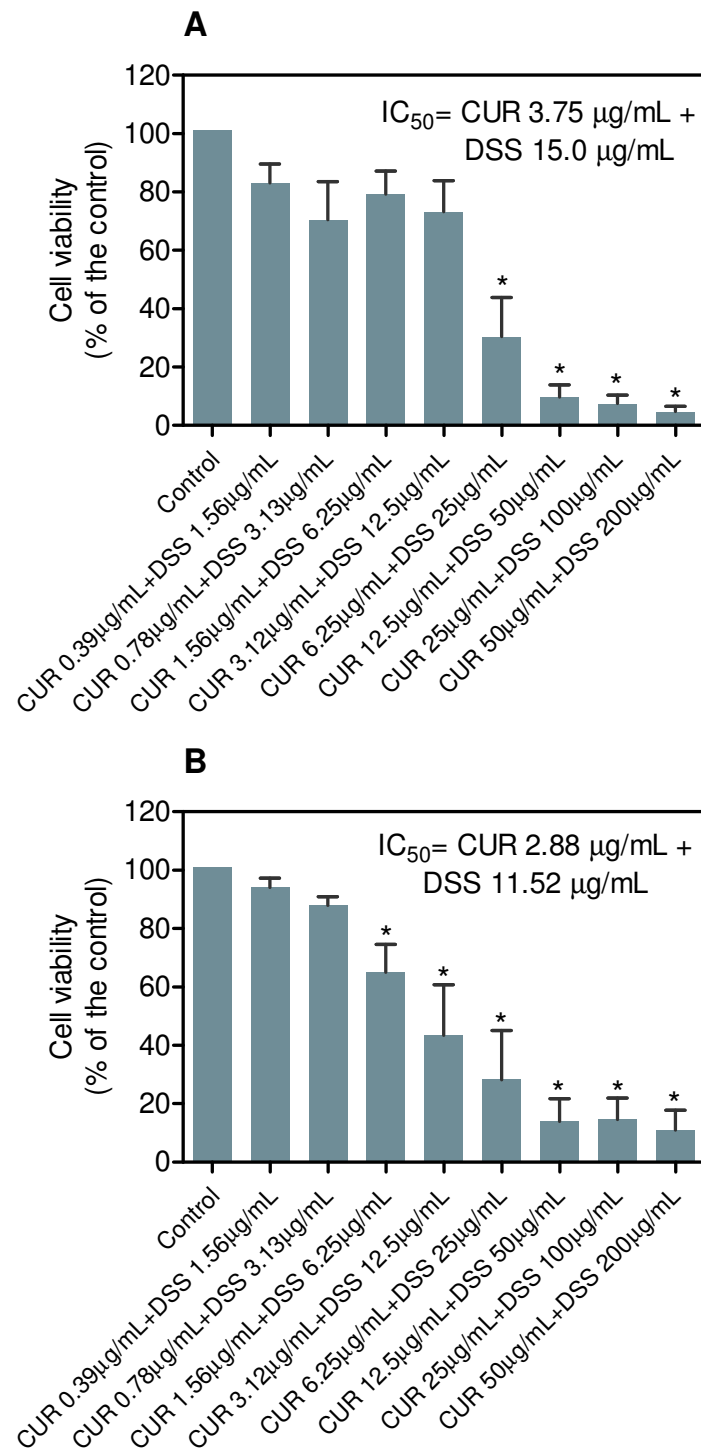

**Figure S3.** Effect of the combination of CUR and DSS at a ratio of 1:4 on the viability of B16-F10 (**A**) and MRC-5 (**B**) cells measured by the alamar blue method after 72 h of incubation. Data are shown as the mean  $\pm$  S.E.M. of at least three independent experiments carried out in duplicate. \* $P < 0.05$  compared with control (untreated cells) by ANOVA followed by Student Newman–Keuls test.

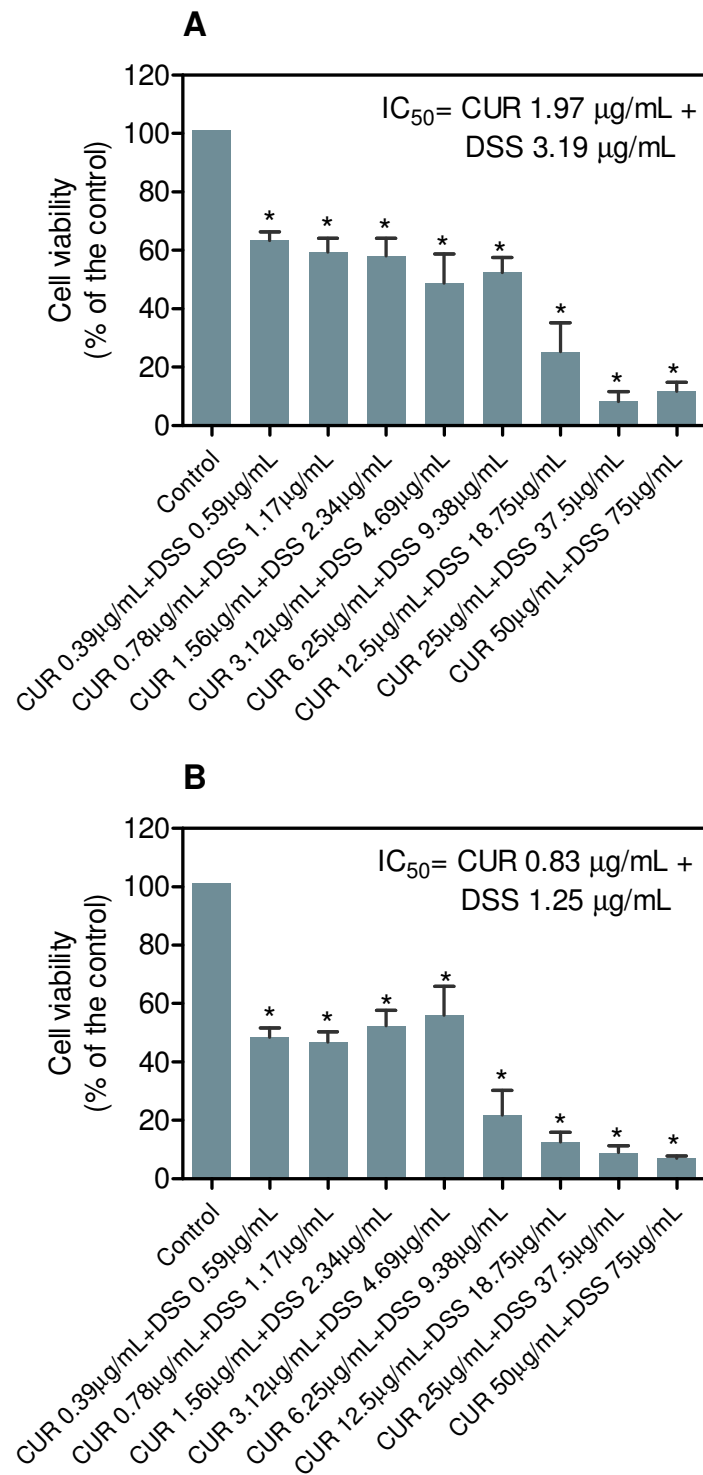

**Figure S4.** Effect of the combination of CUR and DSS at a ratio of 2:3 on the viability of B16-F10 (**A**) and MRC-5 (**B**) cells measured by the alamar blue method after 72 h of incubation. Data are shown as the mean  $\pm$  S.E.M. of at least three independent experiments carried out in duplicate. \* $P < 0.05$  compared with control (untreated cells) by ANOVA followed by Student Newman–Keuls test.



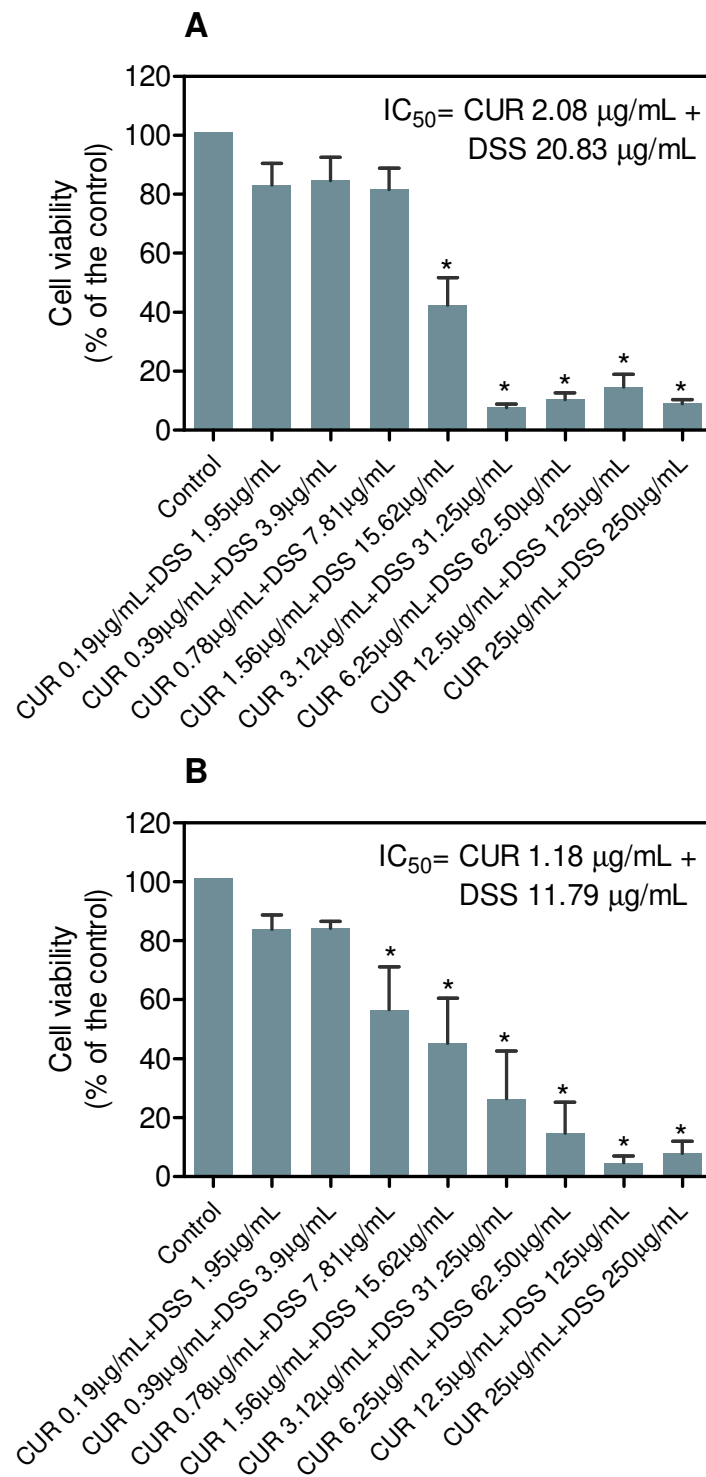

**Figure S5.** Effect of the combination of CUR and DSS at a ratio of 1:10 on the viability of B16-F10 (**A**) and MRC-5 (**B**) cells measured by the alamar blue method after 72 h of incubation. Data are shown as the mean  $\pm$  S.E.M. of at least three independent experiments carried out in duplicate. \* $P < 0.05$  compared with control (untreated cells) by ANOVA followed by Student Newman–Keuls test.

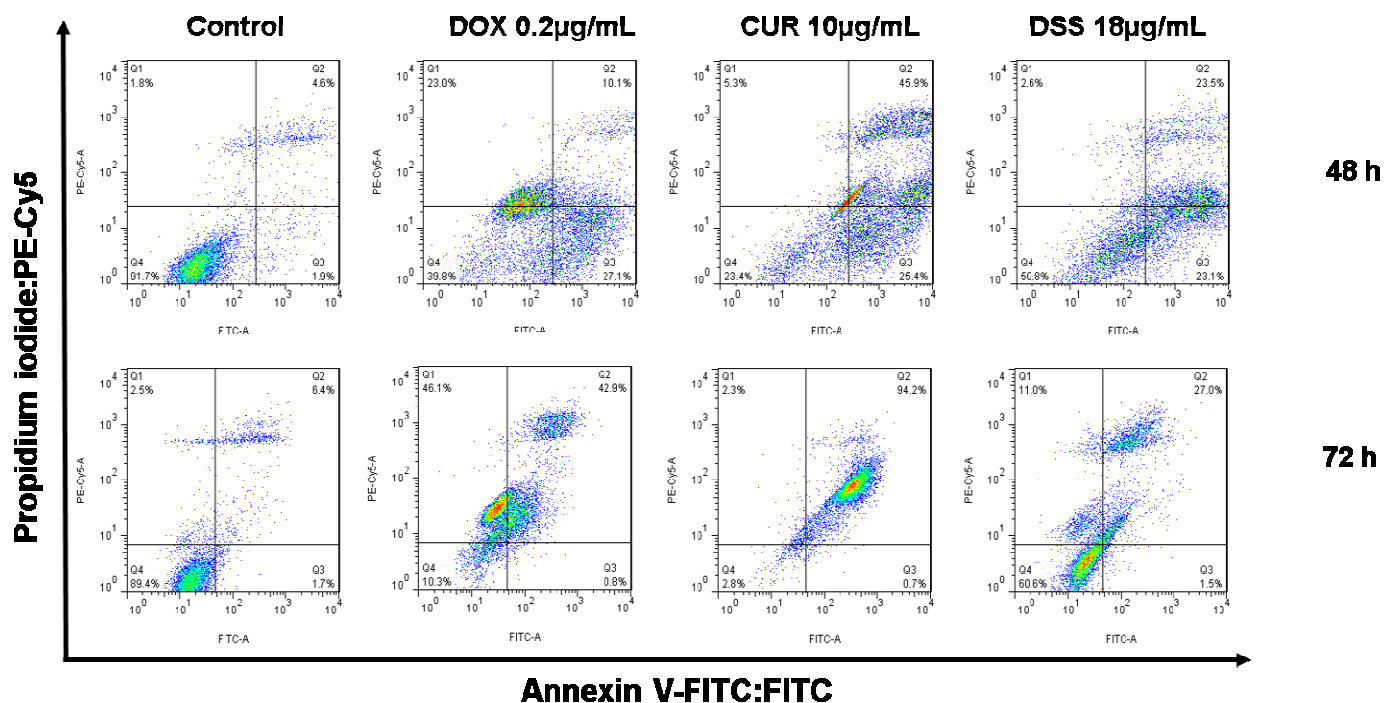

**Figure S6.** Representative dotplots of the effect of CUR and DSS on the viability of B16-F10 cells measured by annexin V-FITC/PI staining. DOX was used as a positive control, and the negative control received 0.5% DMSO.

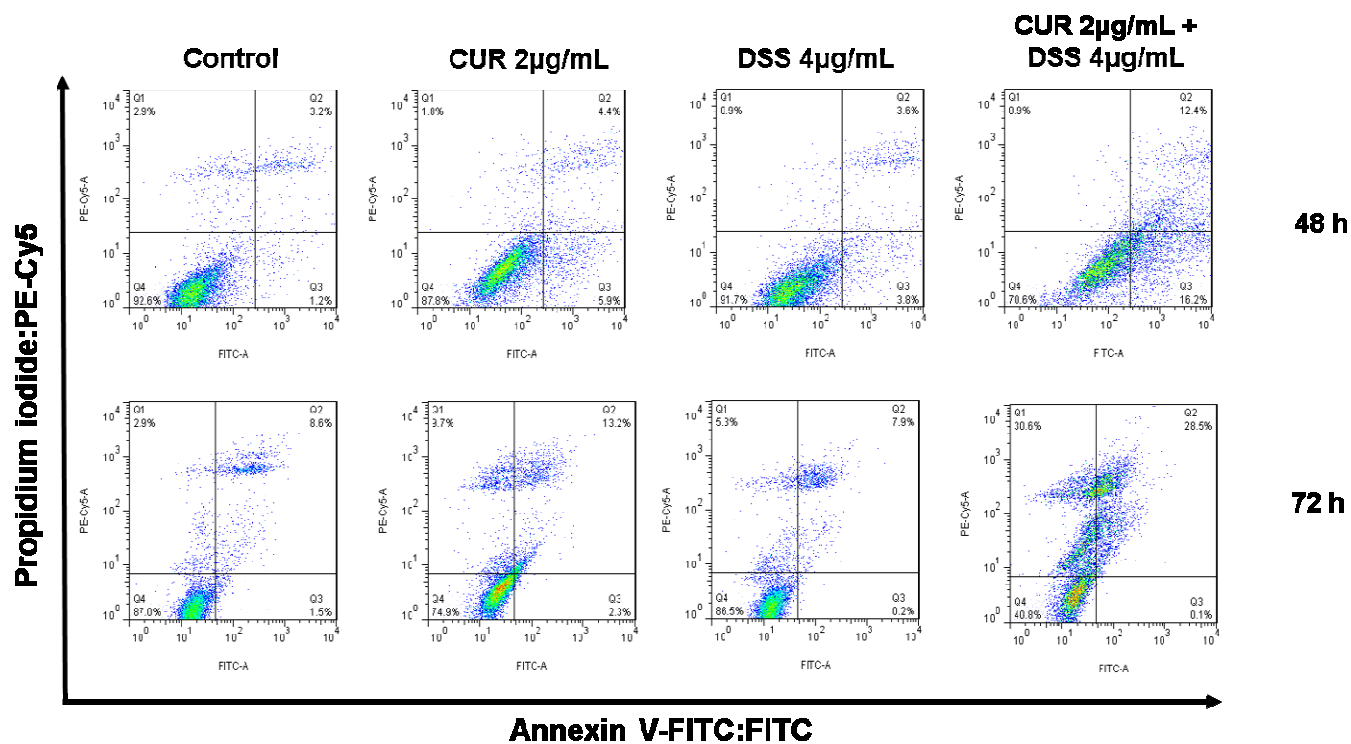

**Figure S7.** Representative dotplots of the effect of the combination of CUR with DSS at a ratio of 1:2 on the viability of B16-F10 cells measured by annexin V-FITC/PI staining. The control received 0.5% DMSO.

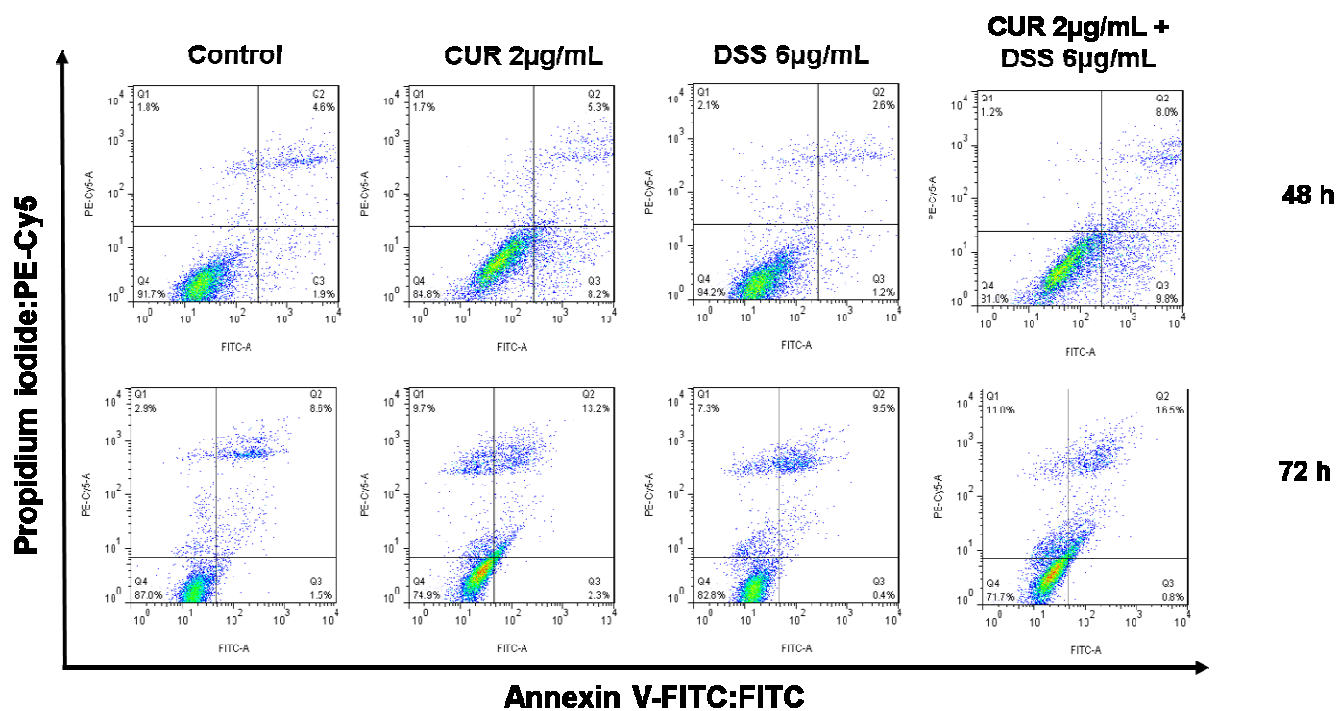

**Figure S8.** Representative dotplots of the effect of the combination of CUR with DSS at a ratio of 1:3 on the viability of B16-F10 cells measured by annexin V-FITC/PI staining. The control received 0.5% DMSO.

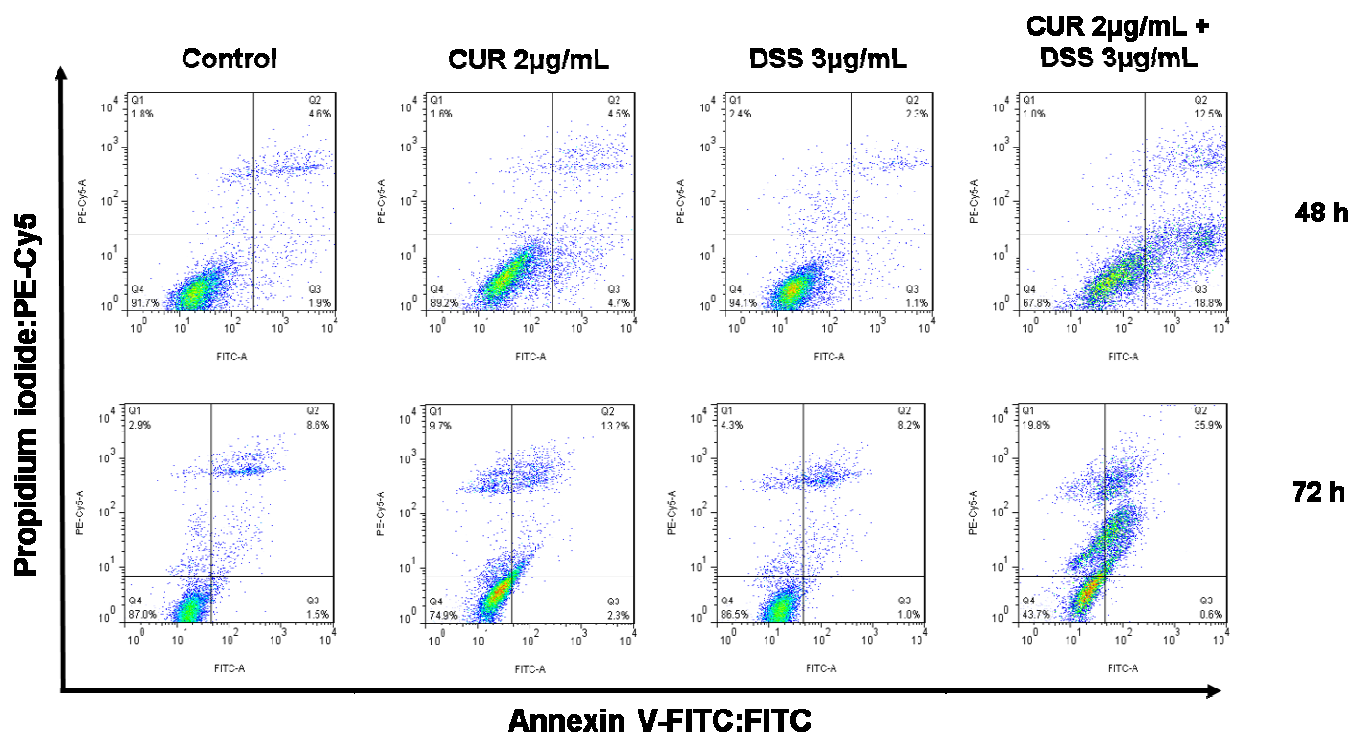

**Figure S9.** Representative dotplots of the effect of the combination of CUR with DSS at a ratio of 2:3 on the viability of B16-F10 cells measured by annexin V-FITC/PI staining. The control received 0.5% DMSO.

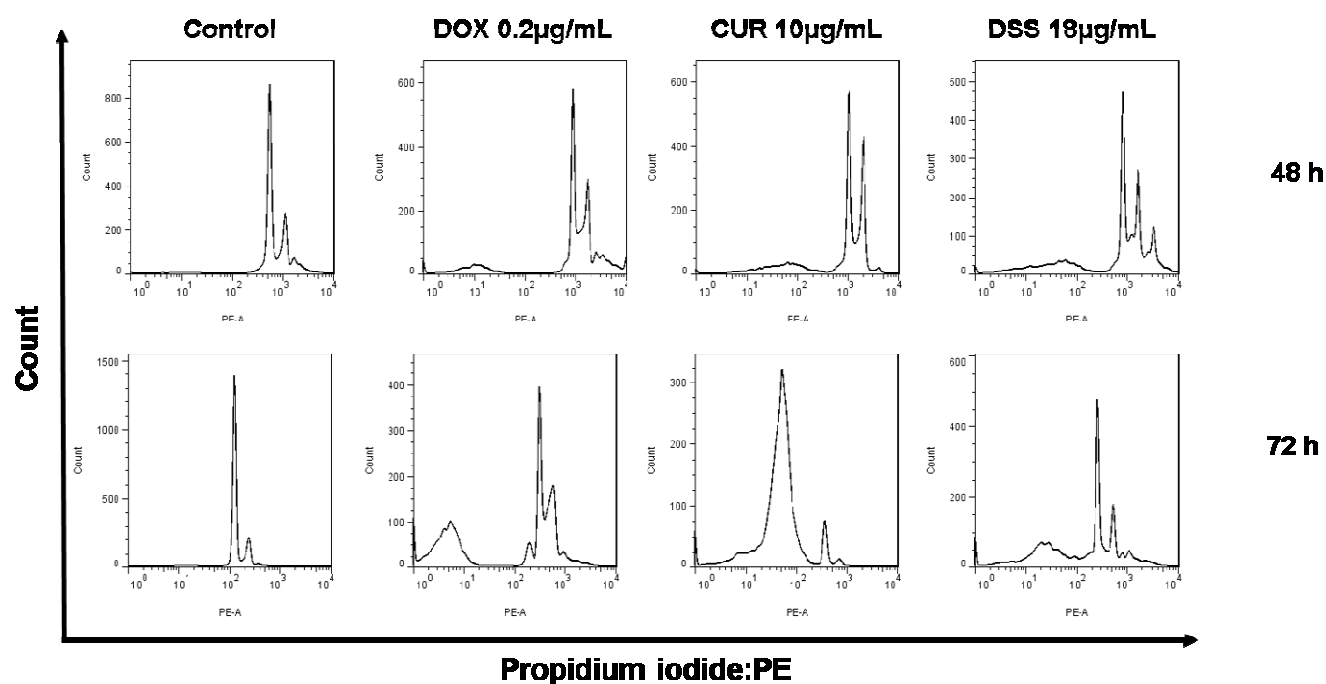

**Figure S10.** Representative histograms of the effect of CUR and DSS on DNA fragmentation and cell cycle distribution of B16-F10 cells. DOX was used as a positive control, and the negative control received 0.5% DMSO.

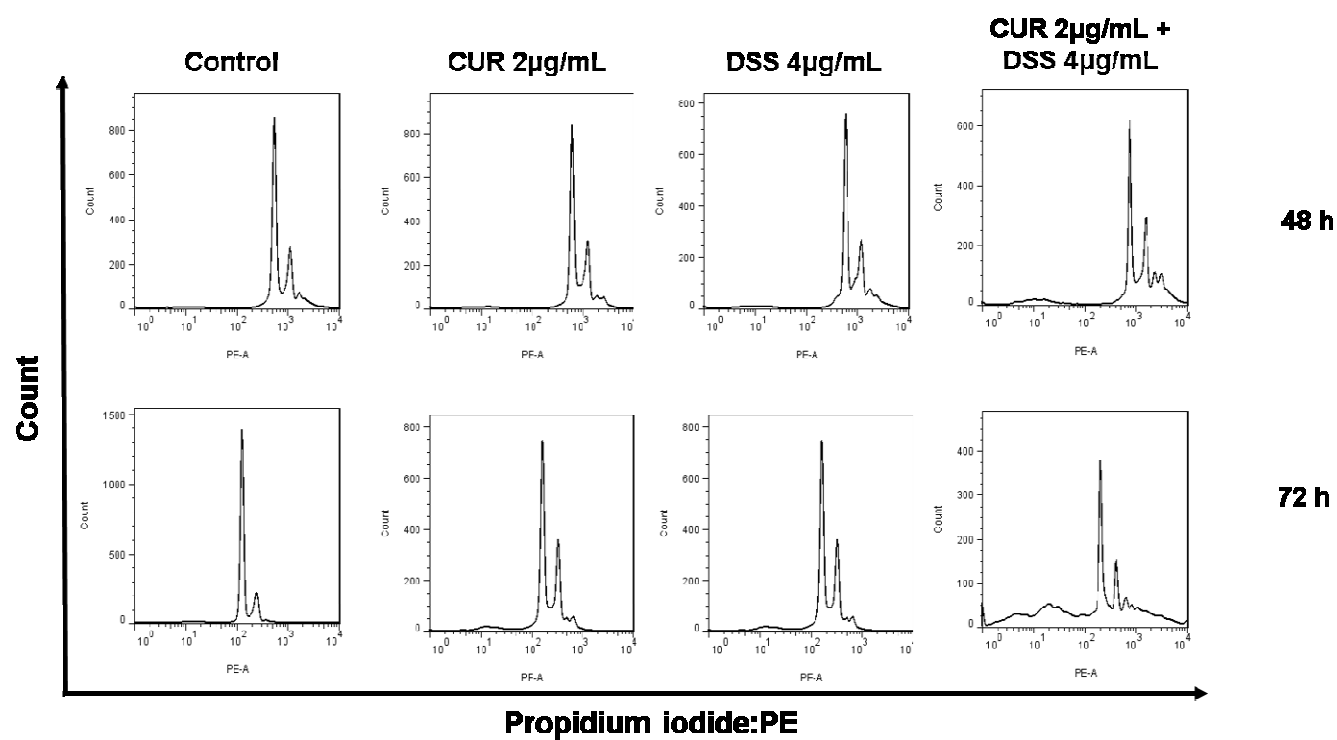

**Figure S11.** Representative histograms of the effect of the combination of CUR with DSS at a ratio of 1:2 on DNA fragmentation and cell cycle distribution of B16-F10 cells. The control received 0.5% DMSO.

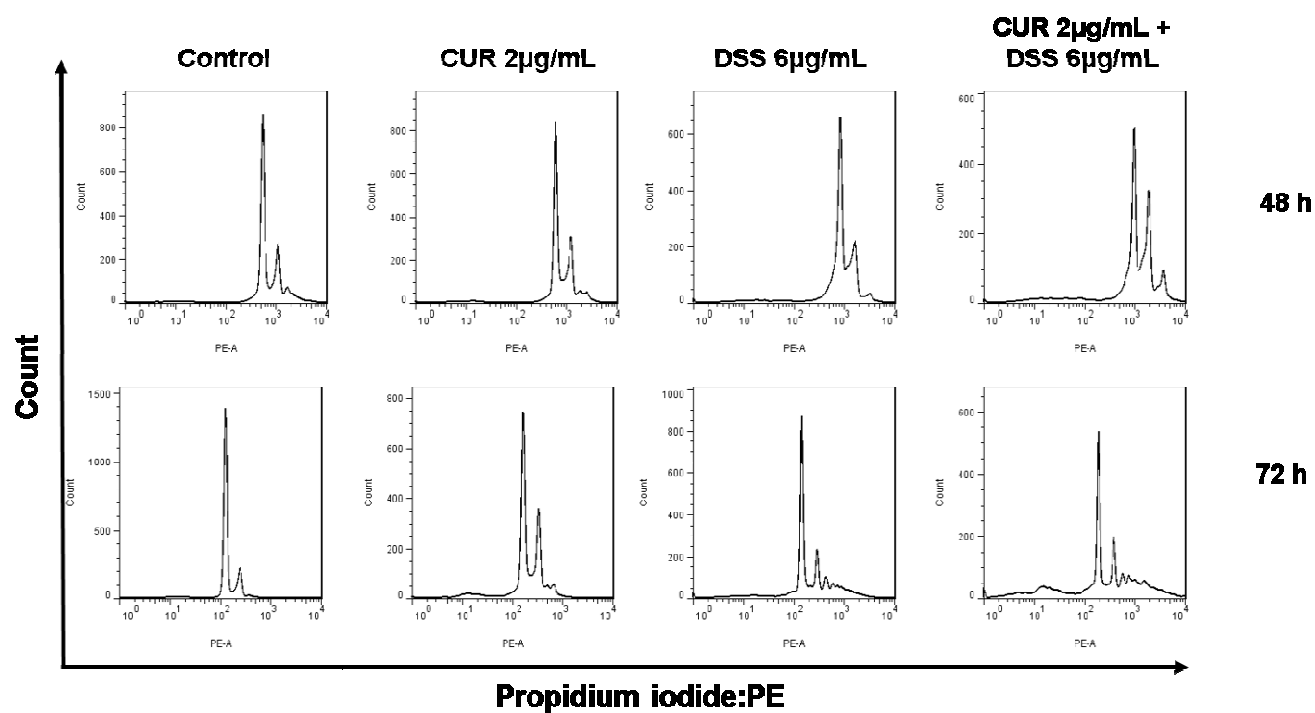

**Figure S12.** Representative histograms of the effect of the combination of CUR with DSS at a ratio of 1:3 on DNA fragmentation and cell cycle distribution of B16-F10 cells. The control received 0.5% DMSO.



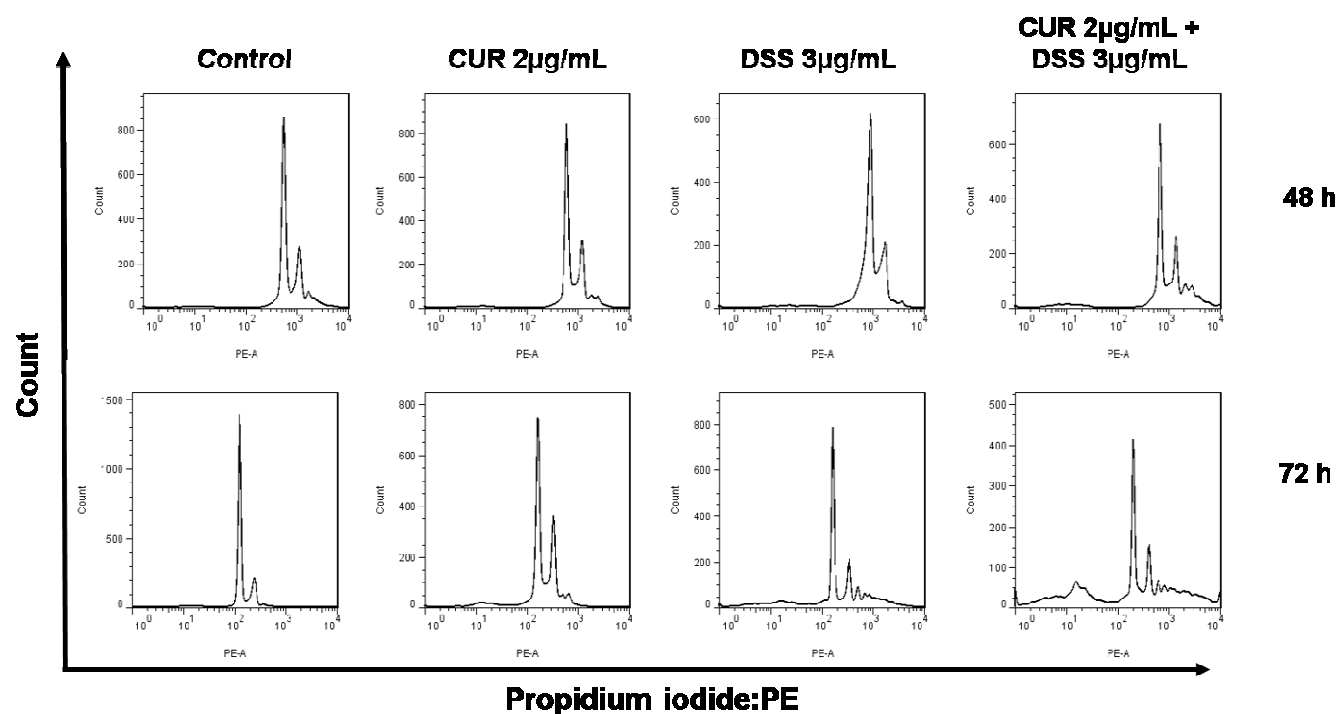

**Figure S13.** Representative histograms of the effect of the combination of CUR with DSS at a ratio of 2:3 on DNA fragmentation and cell cycle distribution of B16-F10 cells. The control received 0.5% DMSO.

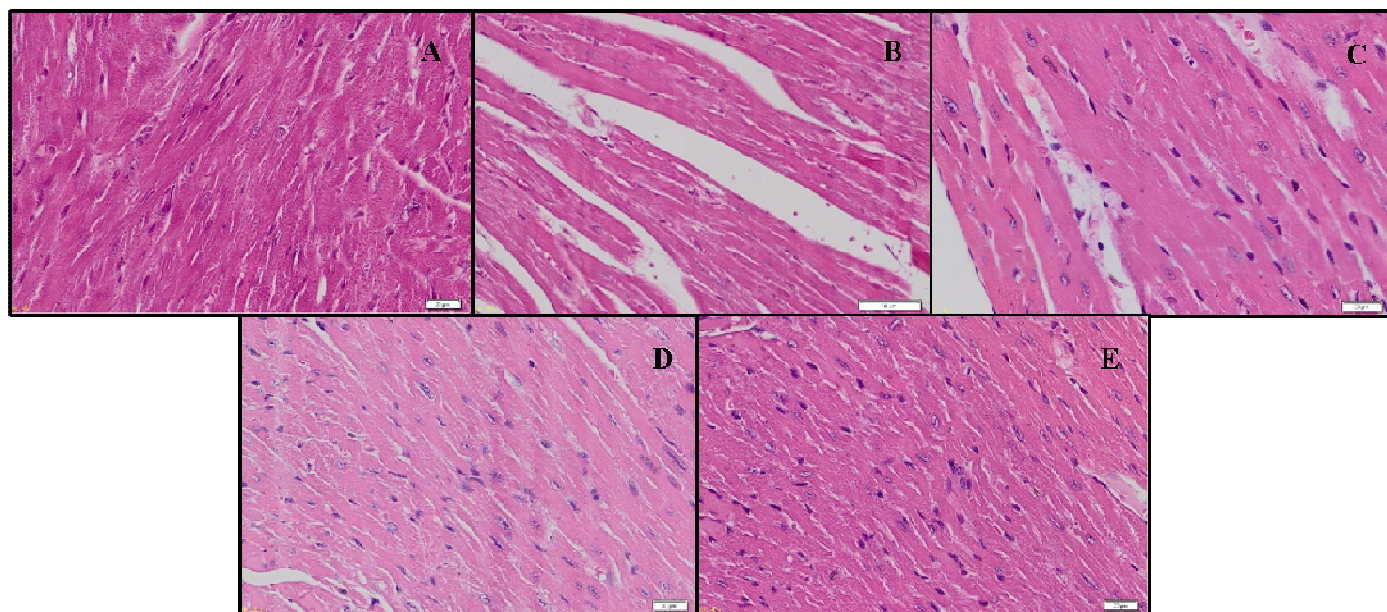

**Figure S14.** Representative histological analysis of hearts stained with hematoxylin and eosin and analyzed by light microscopy. The animals were treated with 5% DMSO (**A**), 1 mg/kg DOX (**B**), 20 mg/kg CUR (**C**), 60 mg/kg DSS (**D**) or 20 mg/kg CUR + 60 mg/kg DSS (**E**). Intact cardiomyocytes are observed with preservation of nuclei and transverse streaks observed longitudinally. Bars = 20  $\mu$ m (**A**, **C**, **D** and **E**) or 50  $\mu$ m (**B**).

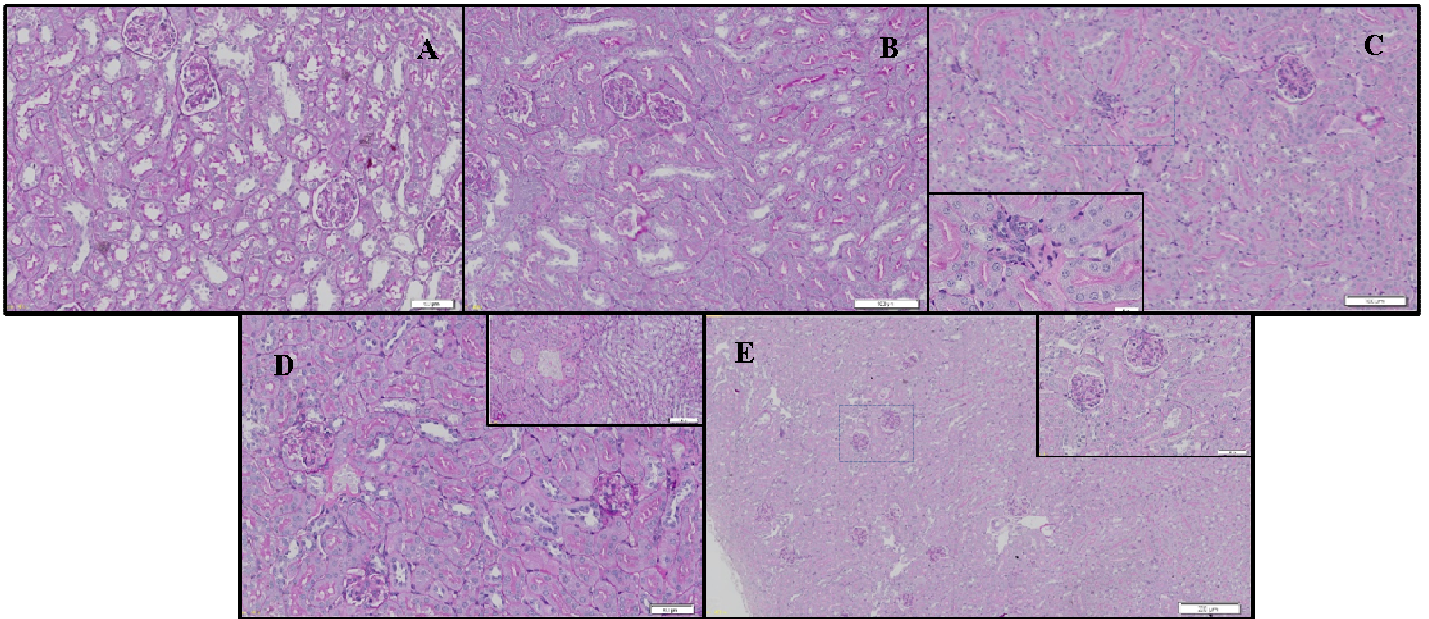

**Figure S15.** Representative histological analysis of kidneys stained with hematoxylin and eosin and analyzed by light microscopy. The animals were treated with 5% DMSO (**A**), 1 mg/kg DOX (**B**), 20 mg/kg CUR (**C**), 60 mg/kg DSS (**D**) or 20 mg/kg CUR + 60 mg/kg DSS (**E**). Bars = 50  $\mu$ m (**A** and **D**), 100  $\mu$ m (**B** and **C**) or 200  $\mu$ m (**E**).

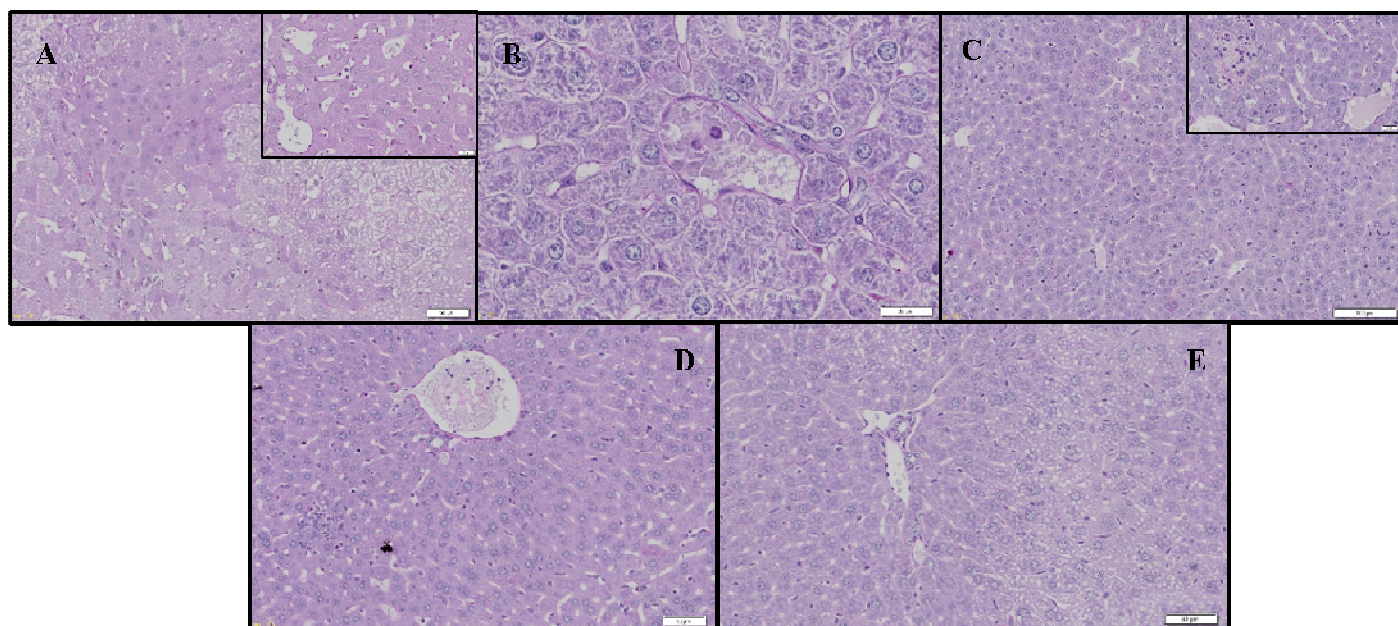

**Figure S16.** Representative histological analysis of livers stained with hematoxylin and eosin and analyzed by light microscopy. The animals were treated with 5% DMSO (**A**), 1 mg/kg DOX (**B**), 20 mg/kg CUR (**C**), 60 mg/kg DSS (**D**) or 20 mg/kg CUR + 60 mg/kg DSS (**E**). Bars = 50  $\mu$ m (**A**, **D** and **E**), 20  $\mu$ m (**B**) or 100  $\mu$ m (**C**).



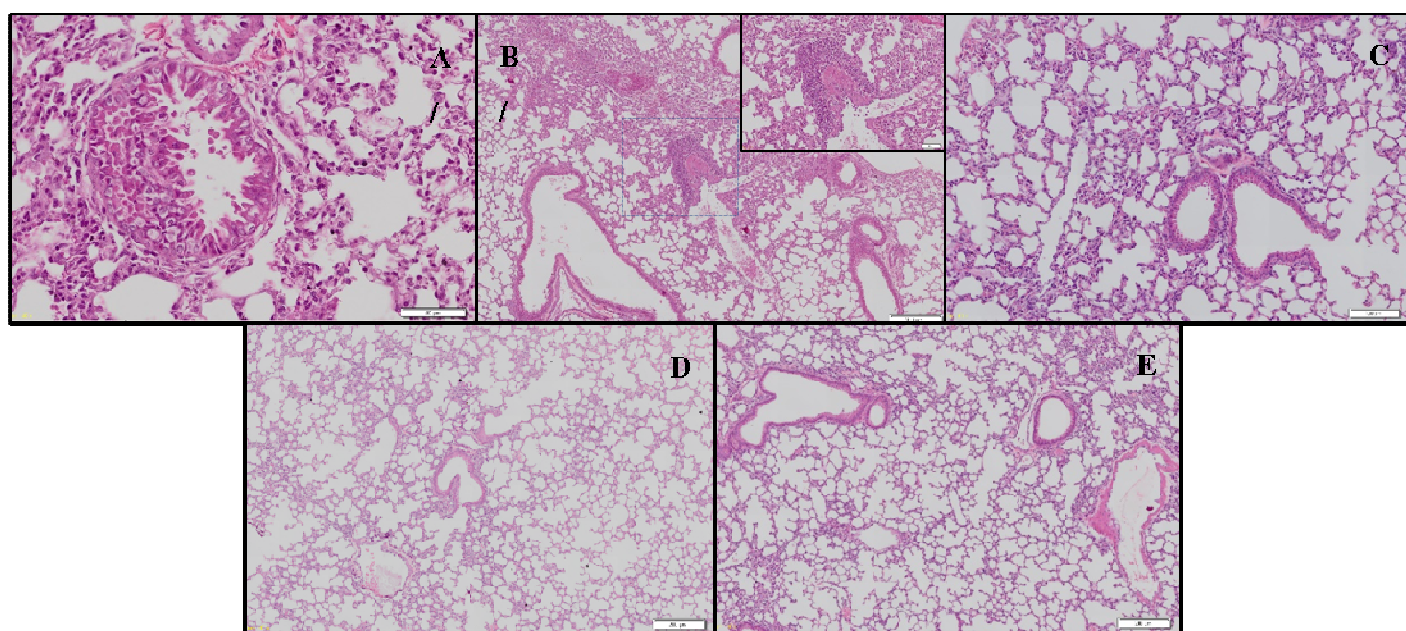

**Figure S17.** Representative histological analysis of lungs stained with hematoxylin and eosin and analyzed by light microscopy. The animals were treated with 5% DMSO (**A**), 1 mg/kg DOX (**B**), 20 mg/kg CUR (**C**), 60 mg/kg DSS (**D**) or 20 mg/kg CUR + 60 mg/kg DSS (**E**). Bars = 50  $\mu$ m (**A**), 200  $\mu$ m (**B**, **D** and **E**) or 100  $\mu$ m (**C**).

**Table S1.** Inhibitory concentrations of CUR and DSS alone and in combination.

|            | Inhibitory<br>effect | CUR<br>combined<br>(µg/mL) | CUR<br>alone<br>(µg/mL) | FIC of<br>CUR | DSS<br>combined<br>(µg/mL) | DSS<br>alone<br>(µg/mL) | FIC of<br>DSS |
|------------|----------------------|----------------------------|-------------------------|---------------|----------------------------|-------------------------|---------------|
| Ratio 1:2  | 25%                  | 8.11                       | 7.69                    | 1.05          | 16.49                      | 14.80                   | 1.11          |
|            | 50%                  | 1.79                       | 9.69                    | 0.18          | 3.98                       | 16.49                   | 0.24          |
|            | 75%                  | 16.21                      | 13.70                   | 1.18          | 32.28                      | 21.47                   | 1.50          |
| Ratio 1:3  | 25%                  | 6.47                       | 7.69                    | 0.84          | 19.43                      | 14.80                   | 1.31          |
|            | 50%                  | 2.76                       | 9.69                    | 0.28          | 8.30                       | 16.49                   | 0.50          |
|            | 75%                  | 8.62                       | 13.70                   | 0.63          | 25.87                      | 21.47                   | 1.20          |
| Ratio 1:4  | 25%                  | 4.35                       | 7.69                    | 0.57          | 17.43                      | 14.80                   | 1.18          |
|            | 50%                  | 3.74                       | 9.69                    | 0.39          | 15.00                      | 16.49                   | 0.91          |
|            | 75%                  | 7.09                       | 13.70                   | 0.52          | 28.38                      | 21.47                   | 1.32          |
| Ratio 2:3  | 25%                  | 8.34                       | 7.69                    | 1.08          | 11.61                      | 14.80                   | 0.78          |
|            | 50%                  | 1.96                       | 9.69                    | 0.20          | 3.18                       | 16.49                   | 0.19          |
|            | 75%                  | 13.67                      | 13.70                   | 1.00          | 20.63                      | 21.47                   | 0.96          |
| Ratio 1:10 | 25%                  | 1.57                       | 7.69                    | 0.20          | 15.80                      | 14.80                   | 1.07          |
|            | 50%                  | 2.08                       | 9.69                    | 0.21          | 20.83                      | 16.49                   | 1.26          |
|            | 75%                  | 2.46                       | 13.70                   | 0.18          | 24.71                      | 21.47                   | 1.15          |

**Table S2.** Effect of CUR and DSS and their combination on body and relative organ weight from C57BL/6 mice bearing B16-F10 cells.

|                               | Control     | DOX         | CUR         | DSS         | CUR + DSS   |
|-------------------------------|-------------|-------------|-------------|-------------|-------------|
| Dose (mg/kg)                  | -           | 1           | 20          | 60          | 20 + 60     |
| Survival                      | 10/10       | 09/10       | 09/10       | 09/10       | 07/10       |
| Initial body weight (g)       | 21.60 ± 1.2 | 27.83 ± 0.4 | 25.65 ± 0.8 | 26.05 ± 0.6 | 23.23 ± 1.1 |
| Final body weight (g)         | 26.83 ± 1.8 | 31.89 ± 0.9 | 29.89 ± 0.9 | 28.56 ± 0.8 | 26.71 ± 2.2 |
| Heart (g/100 g body weight)   | 0.56 ± 0.05 | 0.39 ± 0.02 | 0.40 ± 0.01 | 0.69 ± 0.31 | 0.40 ± 0.05 |
| Liver (g/100 g body weight)   | 5.42 ± 0.6  | 4.14 ± 0.2  | 4.06 ± 0.1  | 3.88 ± 0.2  | 4.21 ± 0.8  |
| Lung (g/100 g body weight)    | 0.68 ± 0.07 | 0.51 ± 0.02 | 0.56 ± 0.06 | 0.57 ± 0.02 | 0.56 ± 0.07 |
| Kidneys (g/100 g body weight) | 1.27 ± 0.1  | 0.92 ± 0.04 | 1.01 ± 0.06 | 1.01 ± 0.04 | 1.03 ± 0.2  |

DOX was used as a positive control, and the negative control received 5% DMSO. Data are shown as the mean ± S.E.M. of 7-10 animals.

**Table S3.** Effect of CUR and DSS and their combination on hematological parameters of peripheral blood from C57BL/6 mice bearing B16-F10 cells

|                                                     | <b>Control</b> | <b>DOX</b>  | <b>CUR</b>  | <b>DSS</b>  | <b>CUR + DSS</b> |
|-----------------------------------------------------|----------------|-------------|-------------|-------------|------------------|
| Dose (mg/kg)                                        | -              | 1           | 20          | 60          | 20 + 60          |
| Erythrocytes<br>(10 <sup>6</sup> /mm <sup>3</sup> ) | 5.8 ± 0.7      | 8.5 ± 0.4*  | 7.0 ± 0.7   | 9.0 ± 0.3** | 6.7 ± 0.6        |
| Hemoglobin<br>(g/dL)                                | 10.2 ± 1.2     | 14.4 ± 0.9* | 12.4 ± 1.0  | 14.8 ± 0.4* | 12.6 ± 0.9       |
| Hematocrit (%)                                      | 35.4 ± 4.5     | 47.7 ± 2.9  | 43.7 ± 4.2  | 49.6 ± 1.1  | 36.6 ± 6.5       |
| MCV (fL)                                            | 63.8 ± 1.6     | 54.3 ± 1.5* | 61.9 ± 2.4  | 59.9 ± 1.5  | 60.6 ± 1.7       |
| Platelets<br>(10 <sup>3</sup> /mm <sup>3</sup> )    | 55 ± 13        | 287 ± 77*   | 83,3 ± 14   | 120 ± 40    | 188 ± 88         |
| Leukocytes<br>(10 <sup>3</sup> /mm <sup>3</sup> )   | 3.5 ± 0.6      | 3.1 ± 0.5   | 2.6 ± 0.4   | 5.5 ± 0.6   | 4.6 ± 0.8        |
| Contagem diferencial de leucócitos (%)              |                |             |             |             |                  |
| Lymphocytes                                         | 53.4 ± 5.7     | 48.9 ± 3.6  | 63.5 ± 5.7  | 47.5 ± 4.9  | 51.4 ± 3.3       |
| Monocytes                                           | 28.2 ± 2.2     | 24.8 ± 2.8  | 22.0 ± 2.9  | 34.2 ± 2.3  | 32.7 ± 2.1       |
| Granulocytes                                        | 18.4 ± 5.3     | 26.3 ± 2.1  | 26.7 ± 12.5 | 18.2 ± 3.4  | 16.0 ± 3.3       |

DOX was used as a positive control. Data are shown as the mean ± S.E.M. of 7-10 animals. \*p < 0.05 compared with control (5% DMSO) by ANOVA followed by Student Newman–Keuls test. MCV: Mean corpuscular volume.
